# Supplementary material for: An integrated Re(i) photocatalyst/sensitizer that activates the formation of formic acid from reduction of CO2
Source: Royal Society of Chemistry journal article supplement (doi:10.1039/c9cc03943k), 2019-01-01
Supplement: c9cc03943k1.pdf [file c9cc03943k1.pdf]

## An Integrated Re(I) Photocatalyst/Sensitizer that Activates the Formation of Formic Acid from Reduction of CO<sub>2</sub>

Yasmeen Hameed, Patrick Berro, Bulat Gabidullin and Darrin Richeson

Department of Chemistry and Biomolecular Sciences, Centre for Catalysis Research and Innovation  
University of Ottawa, 10 Marie Curie, Ottawa, ON K1N 6N5

### Table of Contents

|                                                                                                                                                                                                                                                                                                                                                                             | Pages |
|-----------------------------------------------------------------------------------------------------------------------------------------------------------------------------------------------------------------------------------------------------------------------------------------------------------------------------------------------------------------------------|-------|
| <b>Experimental Procedures</b>                                                                                                                                                                                                                                                                                                                                              | 4-7   |
| <b>Figure S1.</b> Structural representation for the cation of compound <i>cis</i> -Re(CO) <sub>2</sub> (bipy) <sub>2</sub> <sup>+</sup> OTf <sup>-</sup> ( <b>1<sup>+</sup>OTf<sup>-</sup></b> ) obtained from X-ray analysis. Hydrogen atoms are omitted for clarity.                                                                                                      | 8     |
| <b>Figure S2.</b> The cyclic voltammogram under reducing potentials of <i>cis</i> -Re(CO) <sub>2</sub> (bipy) <sub>2</sub> <sup>+</sup> OTf <sup>-</sup> (1.0 mM) under N <sub>2</sub> in CH <sub>3</sub> CN with 0.1M tetrabutylammoniumhexafluorophosphate (TBAHFP) supporting electrolyte at a scan rate of 100 mV/s. Referenced to Fc/Fc <sup>+</sup> .                 | 9     |
| <b>Figure S3.</b> Cyclic voltammograms for <i>cis</i> -Re(CO) <sub>2</sub> (bipy) <sub>2</sub> <sup>+</sup> OTf <sup>-</sup> (1.0 mM) under N <sub>2</sub> in CH <sub>3</sub> CN with 0.1M tetrabutylammonium hexafluorophosphate (TBAHFP) supporting electrolyte with different scan rates.                                                                                | 10    |
| <b>Figure S4.</b> Plot of scan rate <sup>1/2</sup> versus current for the first reduction peak.                                                                                                                                                                                                                                                                             | 10    |
| <b>Figure S5.</b> Plot of scan rate <sup>1/2</sup> versus current for second reduction peak.                                                                                                                                                                                                                                                                                | 11    |
| <b>Figure S6.</b> The cyclic voltammogram under reducing potentials of <i>cis</i> -Re(CO) <sub>2</sub> (bipy) <sub>2</sub> <sup>+</sup> OTf <sup>-</sup> (1.0 mM) under N <sub>2</sub> (blue) OR CO <sub>2</sub> (red) in DMA with 0.1M tetrabutylammoniumhexafluorophosphate (TBAHFP) supporting electrolyte at a scan rate of 100 mV/s. Reference to Fc/Fc <sup>+</sup> . | 12    |
| <b>Figure S7.</b> The cyclic voltammogram under reducing potentials of <i>cis</i> -Re(CO) <sub>2</sub> (bipy) <sub>2</sub> <sup>+</sup> OTf <sup>-</sup> (1.0 mM) under N <sub>2</sub> (blue) OR CO <sub>2</sub> (red) in DMF with 0.1M tetrabutylammoniumhexafluorophosphate (TBAHFP) supporting electrolyte at a scan rate of 100 mV/s. Reference to Fc/Fc <sup>+</sup> . | 12    |
|                                                                                                                                                                                                                                                                                                                                                                             |       |

|                                                                                                                                                                                                                                                                                                                                                                                                                                                                                                                 |    |
|-----------------------------------------------------------------------------------------------------------------------------------------------------------------------------------------------------------------------------------------------------------------------------------------------------------------------------------------------------------------------------------------------------------------------------------------------------------------------------------------------------------------|----|
| <b>Figure S8.</b> The cyclic voltammogram under reducing potentials of <i>cis</i> - $\text{Re}(\text{CO})_2(\text{bipy})_2^+\text{OTf}^-$ (1.0 mM) under $\text{N}_2$ DMF (blue) or in DMF/TEOA (red) with 0.1M tetrabutylammoniumhexafluorophosphate (TBAHFP) supporting electrolyte at a scan rate of 100 mV/s. Referenced to $\text{Fc}/\text{Fc}^+$ .                                                                                                                                                       | 13 |
| <b>Figure S9.</b> A ball and stick structural representation for the computationally optimized $[\text{Re}(\text{CO})_2(\kappa^2\text{-bpy})_2]^+$ compound <b>1<sup>+</sup></b> . DFT calculations used the B3LYP functional and the def2TZVP basis set. Hydrogen atoms are not shown for clarity. Some carbon atoms have been removed for clarity.                                                                                                                                                            | 14 |
| <b>Table S1.</b> A comparison of metal–ligand distances (Å) from the experimental single crystal X-ray analysis and from the computationally optimized structures ( <b>1</b> ) and the single electron reduction product ( <b>A</b> ).                                                                                                                                                                                                                                                                          | 15 |
| <b>Figure S10.</b> Uv-vis of complexes $[\text{Re}(\text{CO})_2(\kappa^2\text{-bpy})_2]^+\text{OTf}^-$ (black), $[\text{Ru}(\text{bpy})_3](\text{PF}_6)_2$ (yellow) and a combination of these two complexes (red). Spectra obtained in $\text{CH}_2\text{Cl}_2$ solvent.                                                                                                                                                                                                                                       | 16 |
| <b>Figure S11.</b> High resolution MS of the headspace of a photocatalytic reduction experiment in DMF using $^{13}\text{CO}_2$ with complex $[\text{Re}(\text{CO})_2(\kappa^2\text{-bpy})_2]^+\text{OTf}^-$ as catalyst. Mass peaks for $\text{H}^{13}\text{CO}_2\text{H}$ , $^{13}\text{CO}_2$ are indicated.                                                                                                                                                                                                 | 17 |
| <b>Figure S12.</b> $^1\text{H}$ NMR spectra for the formyl $\text{HOOC}\text{-}\underline{\text{H}}$ proton of formic acid obtained from photocatalytic reduction of $\text{CO}_2$ using <i>cis</i> - $[\text{Re}(\text{CO})_2(\kappa^2\text{-bpy})_2]^+\text{OTf}^-$ as the catalyst. The bottom spectrum was from reaction using unlabeled $\text{CO}_2$ and the top spectrum is from a reaction with labeled $^{13}\text{CO}_2$ .                                                                            | 18 |
| <b>Figure S13.</b> $^{13}\text{C}$ NMR spectra in $\text{D}_2\text{O}$ for the photocatalytic reduction of $^{13}\text{CO}_2$ (top) to produce formic acid using <i>cis</i> - $\text{Re}(\text{CO})_2(\text{bipy})_2^+\text{OTf}^-$ as the catalyst. For comparison, a reaction using unlabeled $\text{CO}_2$ (bottom) is shown.                                                                                                                                                                                | 18 |
| <b>Table S2.</b> Summary of results for the photocatalytic $\text{CO}_2$ reduction with $[\text{Re}(\text{CO})_2(\kappa^2\text{-bpy})_2]^+\text{OTf}^-$ ( <b>1<sup>+</sup>OTf<sup>-</sup></b> ) in dimethylformamide (DMF), dimethylacetamide (DMA) and acetonitrile ( $\text{CH}_3\text{CN}$ ). Irradiation with 405 nm light conducted on solution under a $\text{CO}_2$ atmosphere for 24 h. Electron donor used was triethanolamine (TEOA).                                                                 | 19 |
| <b>Table S3.</b> The time profile for the $\text{CO}_2$ photocatalytic reduction using $[\text{Re}(\text{CO})_2(\kappa^2\text{-bpy})_2]^+\text{OTf}^-$ ( <b>1<sup>+</sup>OTF<sup>-</sup></b> ) with $\text{Ru}(\text{bpy})_3^{2+}$ as <b>PS</b> in dimethylformamide (DMF). Irradiation with 405 nm light conducted on solution under a $\text{CO}_2$ atmosphere. Electron donor used was triethanolamine (TEOA).                                                                                               | 19 |
| <b>Table S4.</b> Summary of results for the photocatalytic $\text{CO}_2$ reduction with $[\text{Re}(\text{CO})_2(\kappa^2\text{-bpy})_2]^+\text{OTf}^-$ ( <b>1<sup>+</sup>OTf<sup>-</sup></b> ) in dimethylformamide (DMF) or dimethylacetamide (DMA) using added proton sources of either $\text{H}_2\text{O}$ or phenol. Irradiation with 405 nm light conducted on solution under a $\text{CO}_2$ atmosphere for 24 h. Electron donor (approx. 1mL) used was triethanolamine (TEOA) or trimethylamine (TEA). | 20 |
| <b>Table S5.</b> Effects of different concentration of catalyst <i>cis</i> - $[\text{Re}(\text{CO})_2(\text{bipy})_2]^+\text{OTf}^-$ ( <b>1<sup>+</sup>OTF<sup>-</sup></b> ) for the photocatalytic reduction of $\text{CO}_2$ . Reaction conditions: DMA: TEOA (4:1) 4 mL; photosensitizer $[\text{Ru}(\text{bpy})_3]^{2+}$ (1mM) under $\text{CO}_2$ atmosphere.                                                                                                                                              | 21 |
| <b>Figure S14.</b> Representations of $\text{Re}(\text{N,S-NHC})$ and $\text{Re}(\text{Py-NHC-PhCF}_3)$ presented in Table 1 of the manuscript.                                                                                                                                                                                                                                                                                                                                                                 | 22 |
| <b>Figure S15.</b> A ball and stick structural representation for the computationally optimized $[\text{Re}(\text{CO})_2(\kappa^2\text{-bpy})_2]$ compound <b>A</b> . DFT calculations used the B3LYP                                                                                                                                                                                                                                                                                                           | 22 |

|                                                                                                                                                                                                                                                                                                                                                                                                                                                                                                                                                                                                                                                                           |    |
|---------------------------------------------------------------------------------------------------------------------------------------------------------------------------------------------------------------------------------------------------------------------------------------------------------------------------------------------------------------------------------------------------------------------------------------------------------------------------------------------------------------------------------------------------------------------------------------------------------------------------------------------------------------------------|----|
| functional and the def2TZVP basis set. Hydrogen atoms are not shown for clarity. Some carbon atoms have been removed for clarity.                                                                                                                                                                                                                                                                                                                                                                                                                                                                                                                                         |    |
| <b>Figure S16.</b> Representations of the three possible protonation products to yield Re-H intermediates that may arise in the catalytic cycle shown in Figure 3 of the manuscript. Each of these species was computationally optimized as a means of determining the most likely structure of proposed <b>ReH</b> . DFT calculations used the B3LYP functional and the def2TZVP basis set (see Figures S14, S15). The results for the energies associated with each of these possibilities is indicated in Hartrees. This indicated that $[\text{Re}(\text{CO})(\kappa^2\text{-bpy})_2\text{H}]$ was the lowest energy species and was thus used in the proposed cycle. | 23 |
| <b>Figure S17.</b> A ball and stick structural representation for the computationally optimized $[\text{Re}(\text{CO})(\kappa^2\text{-bpy})_2\text{H}]$ compound <b>ReH</b> . DFT calculations used the B3LYP functional and the def2TZVP basis set. Hydrogen atoms are not shown for clarity. Some carbon atoms have been removed for clarity.                                                                                                                                                                                                                                                                                                                           | 24 |
| <b>Figure S18.</b> Ball and stick structural representations for the two isomers of the computationally optimized $[\text{Re}(\text{CO})_2(\kappa^1\text{-bpy})(\kappa^2\text{-bpy})\text{H}]$ compound as a proposed intermediate in the catalytic cycle (see Figure S13 and Figure 3). DFT calculations used the B3LYP functional and the def2TZVP basis set. Hydrogen atoms are not shown for clarity. Some carbon atoms have been removed for clarity.                                                                                                                                                                                                                | 25 |
| <b>Figure S19.</b> A ball and stick structural representation for the computationally optimized $[\text{Re}(\kappa^2\text{-bpy})_2(\text{CO})(\text{OC}(\text{O})\text{H})]$ compound <b>Re(form)</b> . DFT calculations used the B3LYP functional and the def2TZVP basis set. Hydrogen atoms are not shown for clarity. Some carbon atoms have been removed for clarity.                                                                                                                                                                                                                                                                                                 | 26 |
| <b>Figure S20.</b> Additional details for the proposed reduction of <b>1<sup>+</sup></b> to <b>A</b> providing entry into the catalytic cycle represented in Figure 3 of the manuscript text. The upper electron transfer process operates with <b>1<sup>+</sup></b> as an integrated photosensitizer and catalyst. The electrons for the catalytic cycle come from reductive quenching by TEOA of the photoexcited <b>{1<sup>+</sup>}*</b> . The lower process represents the electron cycle that originates from the $\text{Ru}(\text{bpy})_3^{2+}$ photosensitizer.                                                                                                    | 27 |

## Experimental Procedures

**General Procedures.** Reagents and analytical grade solvents were purchased from Strem Chemicals or Sigma Aldrich and used without further purification. The  $^1\text{H}$ ,  $^{13}\text{C}\{^1\text{H}\}$  and  $^{31}\text{P}\{^1\text{H}\}$  NMR spectra were recorded at 400, 100 and 162 MHz respectively with chemical shifts reported in ppm using the residual protons of the NMR solvent as internal standards.

### Synthesis of *cis*- $\text{Re}(\text{CO})_2(\text{bipy})_2^+\text{OTF}^-$ Complex **1**<sup>[7]</sup>

The complex *cis*- $[\text{Re}(\text{CO})_2(\text{bpy})_2](\text{CF}_3\text{SO}_3)$  was synthesized according to the literature from the *fac*- $\text{Re}(\text{bpy})(\text{CO})_3(\text{CF}_3\text{SO}_3)$  complex **A**. Complex **A** (1.895 g, 3.294 mmol) was mixed with a large excess of bpy ( $\approx 2.0\text{g}$ ) with a magnetic stir bar in a Schlenk tube, which was capped with a septum and purged with  $\text{N}_2$ . The reaction mixture was magnetically stirred and heated to reflux for 4 h during which time a red solid appeared. The reaction mixture was cooled and then dissolved in  $\text{CH}_2\text{Cl}_2$  and transferred from the tube to a round bottom flask to remove the solvent under the vacuum. Purification was achieved by column chromatography on acidic alumina with  $\text{CH}_2\text{Cl}_2/\text{CH}_3\text{CN}$  mixtures. Yield: 1.526 g (83%). The  $^1\text{H}$  NMR, UV-visible IR spectra and FAB-MS matched with the reported complex.<sup>31</sup>  $^1\text{H}$  NMR ( $\delta/\text{ppm}$ ,  $\text{CD}_3\text{CN}$ ): 9.45 (d, 2H,  $J = 5.0$  Hz), 8.48 (d, 2H,  $J = 8.6$  Hz), 8.40 (d, 2H,  $J = 8.6$  Hz), 8.15 (dt, 2H,  $J = 1.5, 8.1$  Hz), 8.02 (dt, 2H,  $J = 1.5, 8.1$  Hz), 7.63 (m, 2H), 7.41 (dd, 2H,  $J = 1.0, 5.5$  Hz), 7.34 (m, 2H). UV-visible ( $\lambda$  (nm),  $\text{CH}_2\text{Cl}_2$ ) ( $\epsilon$  in  $\text{M}^{-1} \text{cm}^{-1}$ ): 288 (47400), 364 (6100), 400 (6590), 492 (5320), 564 (sh, 3660). IR ( $\text{CH}_2\text{Cl}_2$ ) ( $\nu(\text{CO})$ ,  $\text{cm}^{-1}$ ): 1992, 1852. FAB-MS<sup>+</sup>: 555.08.  $^{13}\text{C}$  -NMR ( $\text{CD}_3\text{CN}$ ):  $\delta$  117.3, 123.9, 124.8, 127.3, 128.1, 137.6, 139.5, 147.8, 155.8, 200.3. Analysis calcd for  $\text{C}_{23}\text{H}_{16}\text{F}_3\text{N}_4\text{O}_5\text{ReS}$ : C, 39.26; H, 2.29; N, 7.96; Found: C 39.34; H 2.13; N 8.06.

Crystals suitable for X-ray analysis were grown by diffusion of saturated  $\text{CH}_2\text{Cl}_2$  solution in  $\text{CH}_3\text{CN}$ . The structure of the rhenium (I) dicarbonyl compound is shown in Figure **S1**.

**Typical Photocatalytic Experiments:** A 20 mL glass vial with a magnetic stir bar was charged, in a nitrogen filled glovebox, with 4mL of a solvent dimethylacetamide (DMA) or acetonitrile (MeCN) or N,N-dimethylformamide (DMF) that contained catalyst, photosensitizer ( $[\text{Ru}(\text{bpy})_3](\text{PF}_6)_2$ ), and approx. 1mL triethanolamine (TEOA) as an electron donor. The vial was sealed and removed from the glovebox. The solution was purged with  $\text{CO}_2$  for 15 minutes and irradiated using a 405 nm LED light (radiant flux at 700 mA of 1050 mW) for 24 hours. The light intensity was measured to be  $3.4 \times 10^{-8}$  moles photons/s using a  $\text{Ru}(\text{bpy})_3^{2+}/1,9$ -diphenylanthracene (DPA) actinometer.<sup>[1,2]</sup> After irradiation, carbon monoxide and hydrogen production were measured using an Agilent 7820A gas chromatograph (GC) with an Agilent select permanent gases column and equipped with a thermal conductivity detector (TCD). The liquid products from the photocatalytic reactions were analyzed using  $^1\text{H}$  NMR. A calibration curve for formic acid was prepared in  $\text{D}_2\text{O}$  containing dimethyl sulfone as an internal standard. An aliquot (100 $\mu\text{L}$ ) was removed from the irradiated samples and was mixed in an NMR tube with  $\text{D}_2\text{O}$  containing a known amount of dimethyl sulfone (400  $\mu\text{L}$ ). The sample was mixed well and the  $^1\text{H}$  NMR spectra were collected. Using the integrated values for the formic acid ( $\delta \approx 8.1\text{ppm}$ ) and a calibration curve, the amount of formic acid was determined. High resolution mass spectrometry for analysis of  $^{13}\text{CO}$  and  $\text{H}^{13}\text{COOH}$  was performed using a Kratos Concept 1S HiRes Electron Impact Magnetic Sector Mass Spectrometer using a inlet system in the John L. Holmes Mass Spectrometry Center at the University of Ottawa. A similar experiment was carried out using catalyst employing  $^{13}\text{CO}_2$  (99%  $^{13}\text{C}$  and <3%  $^{18}\text{O}$  from Sigma-Aldrich) at a pressure was 20 PSI. The mixture was stirred and exposed to 405 nm blue LED for 24 h, and the gas phase products were analyzed as described.

**Electrochemistry:** Electrochemical experiments were carried out in a single compartment cell wrapped with aluminum foil using a VersaSTAT 3 (Princeton Applied Research) potentiostat. Samples were prepared in a glovebox, sealed, removed from the glovebox and connected to a

Schlenk line and maintained under a nitrogen atmosphere. A conventional three electrode system was employed consisting of a glassy carbon working electrode (diameter = 0.3 cm), a Pt wire as the auxiliary electrode, and an Ag wire as a pseudo-reference electrode. Ferrocene was added as a reference compound and potentials were referred to the redox potential of ferrocene (Fc)/ferrocenium ion (Fc<sup>+</sup>) as an internal standard. Dried acetonitrile was purchased from Sigma Aldrich and stored on molecular sieves in glove-box. Tetrabutylammoniumhexafluorophosphate, [(n-Bu)<sub>4</sub>N]PF<sub>6</sub> (TBAHFP), the supporting electrolyte, was crystallized two times with methanol, dried in vacuum at 90 °C for 24 h before used and stored in a glovebox. The electrolyte solution, 0.1 M [(n-Bu)<sub>4</sub>N]PF<sub>6</sub> in CH<sub>3</sub>CN, was saturated with N<sub>2</sub> by purging with N<sub>2</sub> for 10 min prior to each experiment. The typical concentration of catalyst was 1 mM (15 mL acetonitrile) in each experiment.

**X-ray Crystallography:** The crystals were mounted on thin glass fibers using paraffin oil. Prior to data collection crystals were cooled to 200.15 °K. Data were collected on a Bruker AXS SMART single crystal diffractometer equipped with a sealed Mo tube source (wavelength 0.71073 Å) APEX II CCD detector. Raw data collection and processing were performed with APEX II software package from BRUKER AXS.<sup>[3]</sup> Initial unit cell parameters were determined from 60 data frames with 0.3°  $\omega$  scan each collected at the different sections of the Ewald sphere. Semi-empirical absorption corrections based on equivalent reflections were applied.<sup>[4]</sup> Systematic absences in the diffraction data-set and unit-cell parameters were consistent with the assigned space group. The structures were solved by direct methods, completed with difference Fourier synthesis, and refined with full-matrix least-squares procedures based on  $F^2$ . All hydrogen atoms positions were calculated based on the geometry of the related non-hydrogen atoms. All hydrogen atoms were treated as idealized contributions during the refinement. All scattering factors are contained in several versions of the SHELXTL program library, with the latest version used being v.6.12.<sup>[5]</sup>

**Computational Details:** Optimized structures were obtained from density functional theory (DFT) computations using Gaussian 09.<sup>[6]</sup> The B3LYP functional and def2TZVP basis set was used for all atoms.

### **Emission-Quenching Experiments**

The emission-spectra was obtained according to similar procedure in the reported literature.<sup>2</sup> In a nitrogen filled glovebox, solutions of the photosensitizer  $\text{Ru}(\text{bpy})_3(\text{PF}_6)_2$  (0.1 mM) in anhydrous acetonitrile were prepared containing different concentrations of the quencher. The steady-state emission spectrum (excitation wavelength 450 nm) of each solution was recorded, and the intensity of the luminescence for the  $^3\text{MLCT}$  excited state of the photosensitizer (452 nm) was recorded.

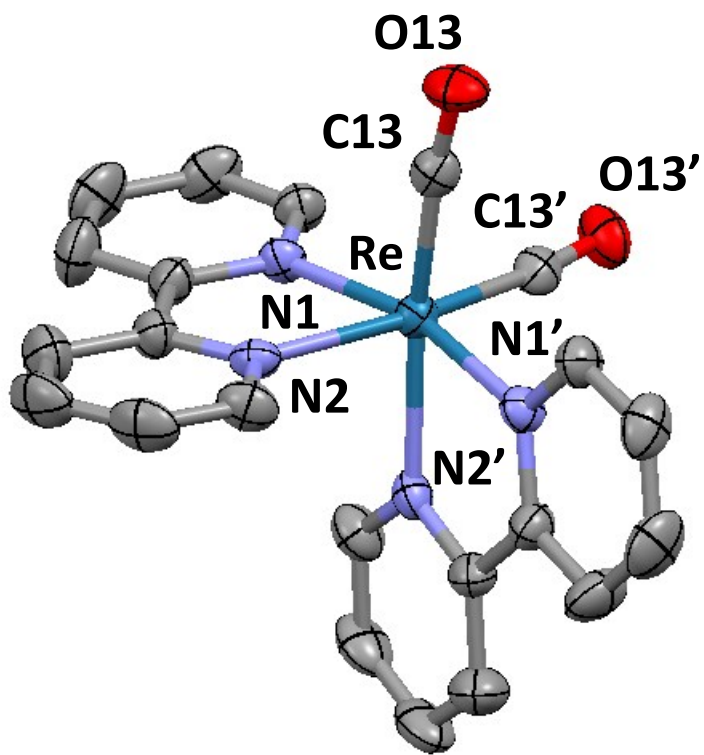

**Figure S1.** Structural representation for the cation of compound *cis*-Re(CO)<sub>2</sub>(bipy)<sub>2</sub><sup>+</sup>OTf<sup>-</sup> (1<sup>+</sup>OTf<sup>-</sup>) obtained from X-ray analysis. Hydrogen atoms are omitted for clarity.



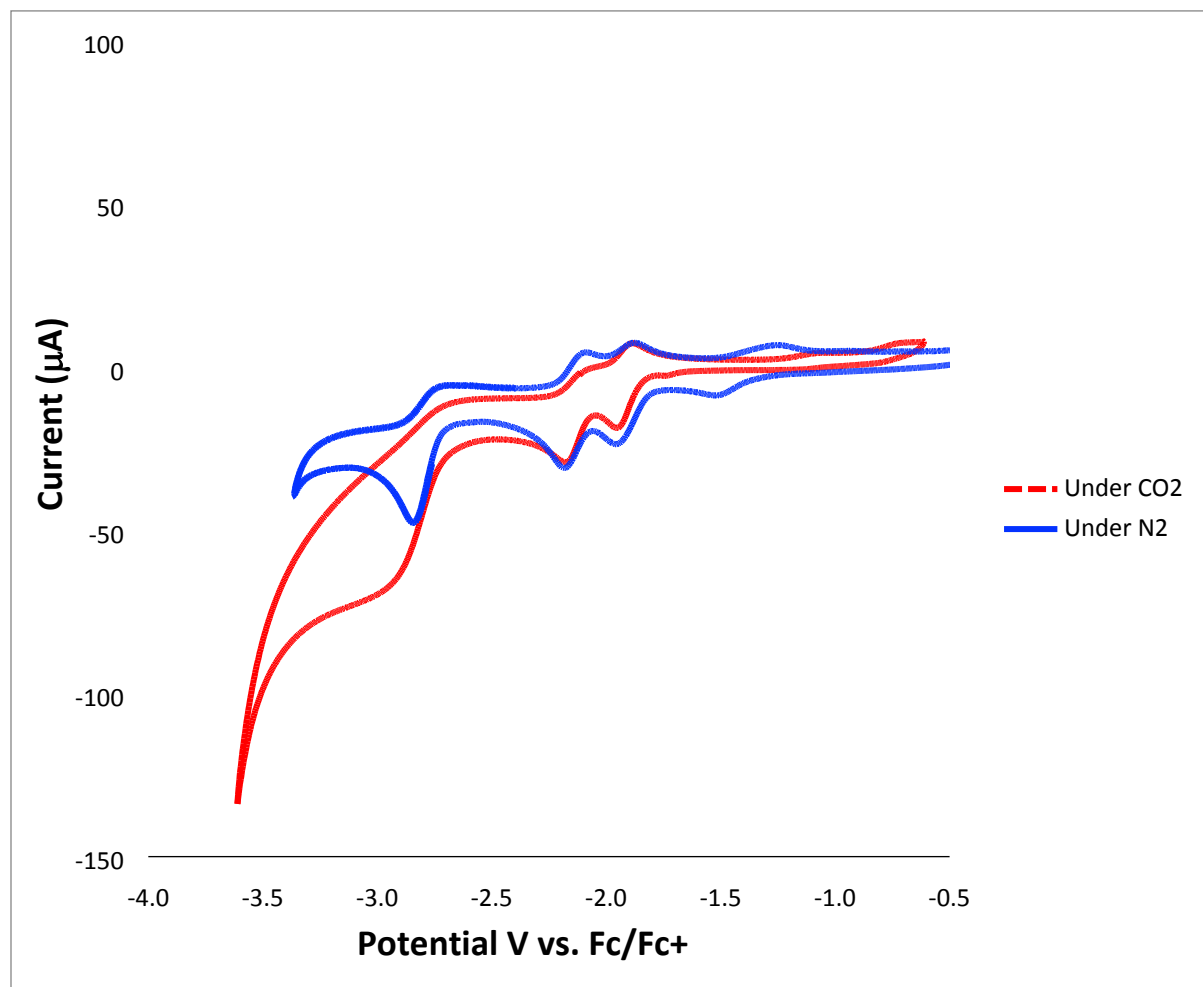

**Figure S2.** The cyclic voltammogram under reducing potentials of *cis*-Re(CO)<sub>2</sub>(bipy)<sub>2</sub><sup>+</sup>OTf (1.0 mM) under N<sub>2</sub> (blue) OR CO<sub>2</sub> (red) in CH<sub>3</sub>CN with 0.1M tetrabutylammoniumhexafluorophosphate (TBAHFP) supporting electrolyte at a scan rate of 100 mV/s. Reference to Fc/Fc<sup>+</sup>.

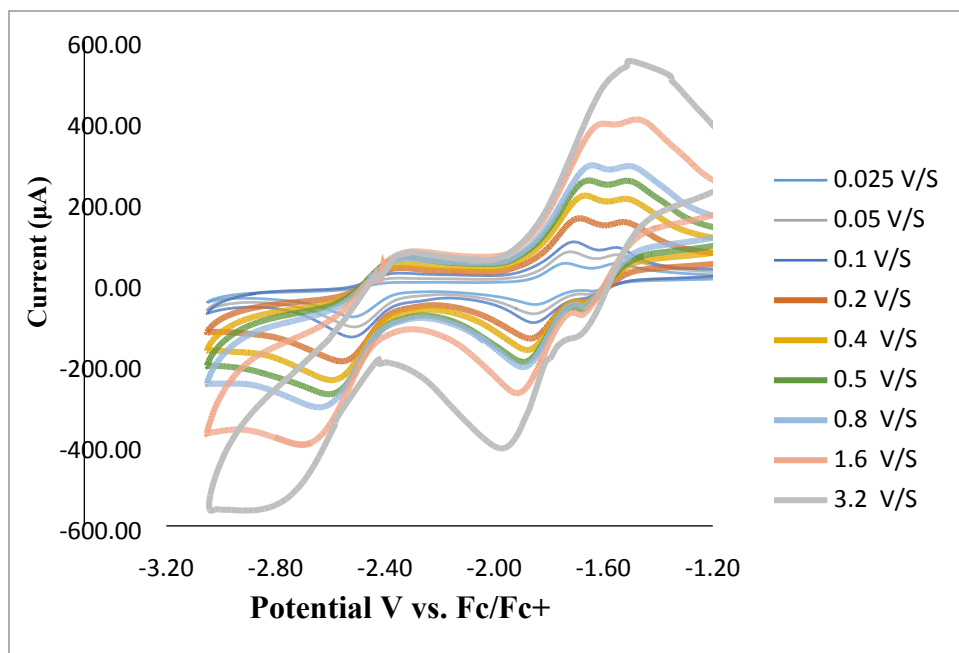

**Figure S3.** Cyclic voltammograms for *cis*-Re(CO)<sub>2</sub>(bipy)<sub>2</sub><sup>+</sup>OTf (1.0 mM) under N<sub>2</sub> in CH<sub>3</sub>CN with 0.1M tetrabutylammonium hexafluorophosphate (TBAHFP) supporting electrolyte with different scan rates.

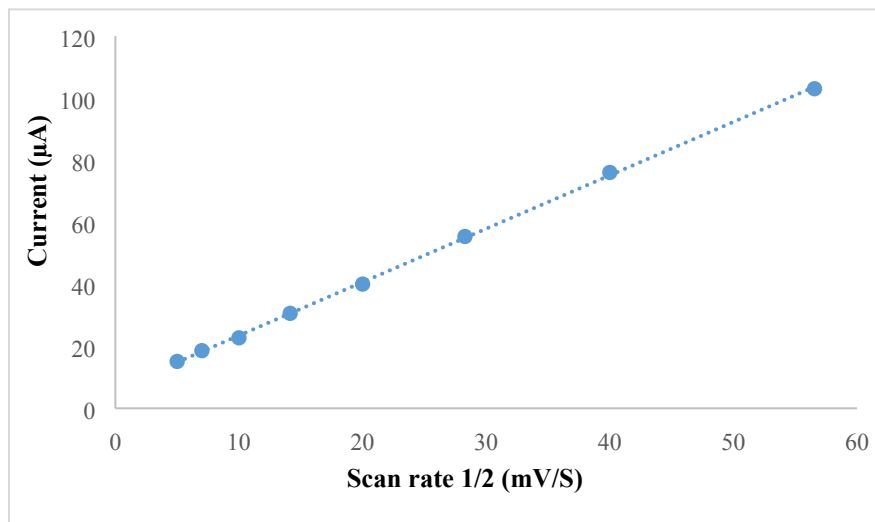

**Figure S4.** Plot of scan rate<sup>1/2</sup> versus current for the first reduction peak.

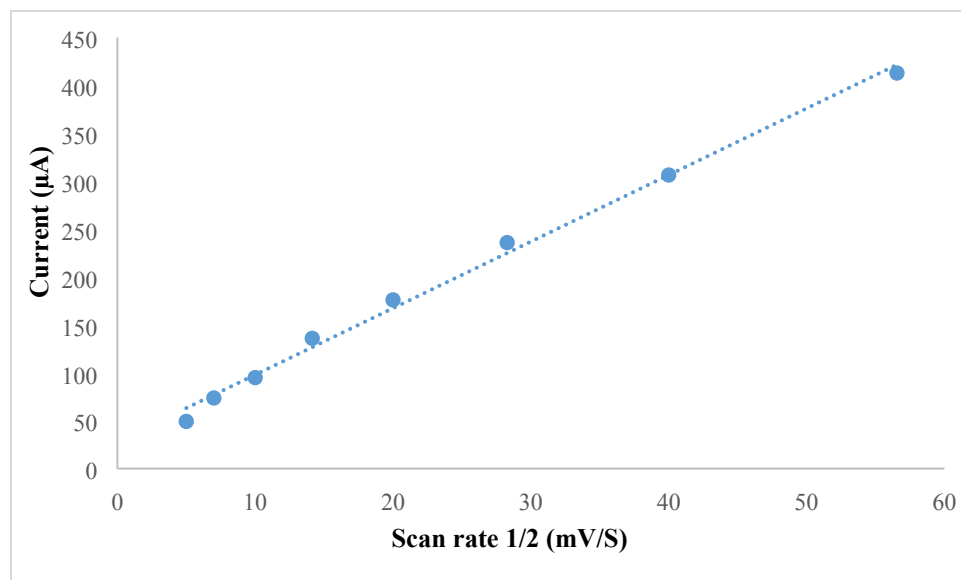

**Figure S5.** Plot of scan rate<sup>1/2</sup> versus current for second reduction peak.

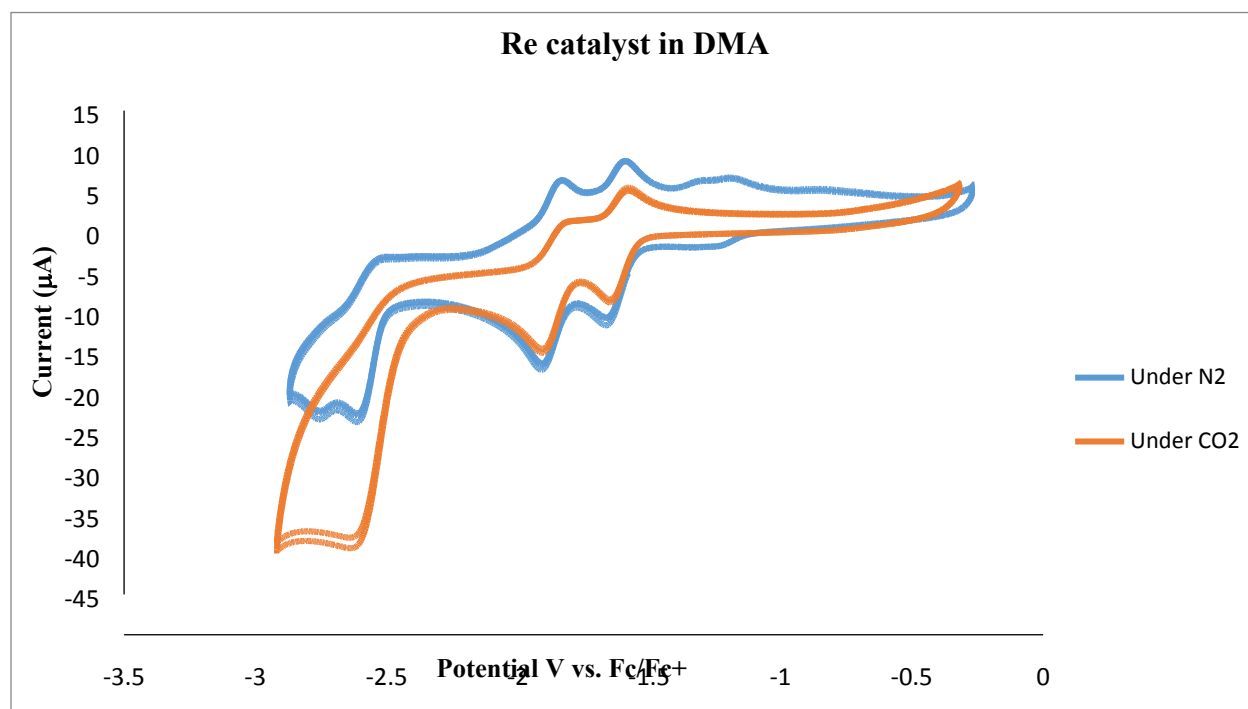

**Figure S6.** The cyclic voltammogram under reducing potentials of *cis*-Re(CO)<sub>2</sub>(bipy)<sub>2</sub><sup>+</sup>OTf (1.0 mM) under N<sub>2</sub> (blue) OR CO<sub>2</sub> (red) in DMA with 0.1M tetrabutylammoniumhexafluorophosphate (TBAHFP) supporting electrolyte at a scan rate of 100 mV/s. Reference to Fc/Fc<sup>+</sup>.

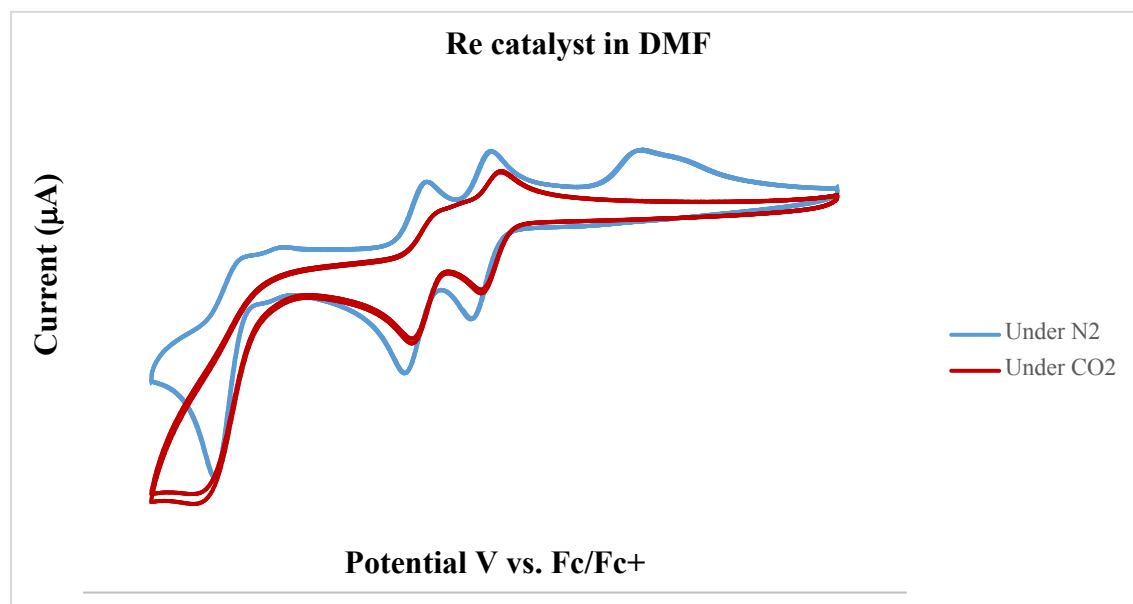

**Figure S7.** The cyclic voltammogram under reducing potentials of *cis*-Re(CO)<sub>2</sub>(bipy)<sub>2</sub><sup>+</sup>OTf (1.0 mM) under N<sub>2</sub> (blue) OR CO<sub>2</sub> (red) in DMF with 0.1M tetrabutylammoniumhexafluorophosphate (TBAHFP) supporting electrolyte at a scan rate of 100 mV/s. Reference to Fc/Fc<sup>+</sup>.

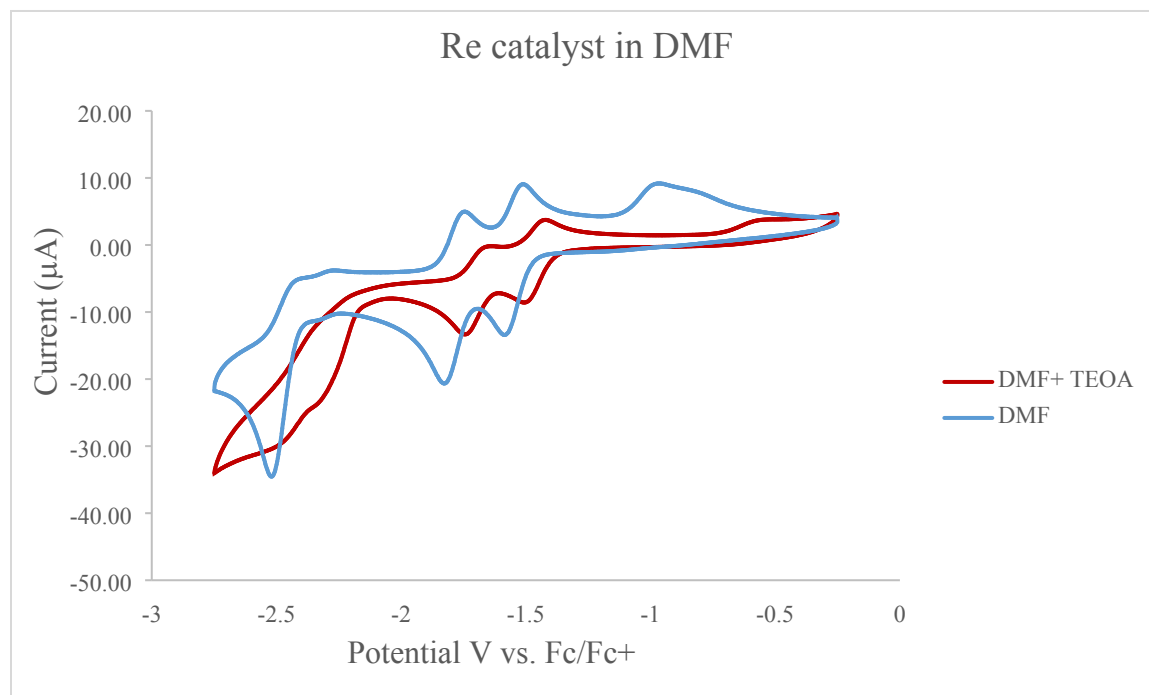

**Figure S8.** The cyclic voltammogram under reducing potentials of *cis*-Re(CO)<sub>2</sub>(bipy)<sub>2</sub><sup>+</sup>OTf (1.0 mM) under N<sub>2</sub> DMF (blue) or in DMF/TEOA (red) with 0.1M tetrabutylammoniumhexafluorophosphate (TBAHFP) supporting electrolyte at a scan rate of 100 mV/s. Referenced to Fc/Fc<sup>+</sup>.

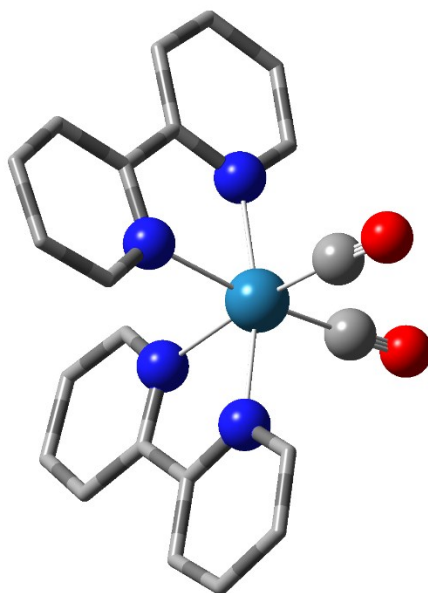

**Figure S9.** A ball and stick structural representation for the computationally optimized  $[\text{Re}(\text{CO})_2(\kappa^2\text{-bpy})_2]^+$  compound **1**<sup>+</sup>. DFT calculations used the B3LYP functional and the def2TZVP basis set. Hydrogen atoms are not shown for clarity. Some carbon atoms have been removed for clarity.

**Table S1.** A comparison of metal–ligand distances (Å) from the experimental single crystal X-ray analysis and from the computationally optimized structures (**1**) and the single electron reduction product (**A**).

| Bond /compd         | [Re( $\kappa^2$ -bpy) <sub>2</sub> (CO) <sub>2</sub> ] <sup>+</sup> ( <b>1</b> )<br>X-ray analysis | [Re( $\kappa^2$ -bpy) <sub>2</sub> (CO) <sub>2</sub> ] <sup>+</sup> ( <b>1</b> )<br>Computed | Reduced complex [Re( $\kappa^2$ -bpy) <sub>2</sub> (CO) <sub>2</sub> ] ( <b>A</b> )<br>Computed |
|---------------------|----------------------------------------------------------------------------------------------------|----------------------------------------------------------------------------------------------|-------------------------------------------------------------------------------------------------|
| M-N trans CO        | 2.165(3)                                                                                           | 2.215                                                                                        | 2.2028                                                                                          |
| M-N trans N         | 2.121(3)                                                                                           | 2.147                                                                                        | 2.1319                                                                                          |
| M-CO                | 1.883(5)                                                                                           | 1.921                                                                                        | 1.9156                                                                                          |
| N-M-N <sub>py</sub> | 75.15(13)                                                                                          | 74.67                                                                                        | 75.326                                                                                          |

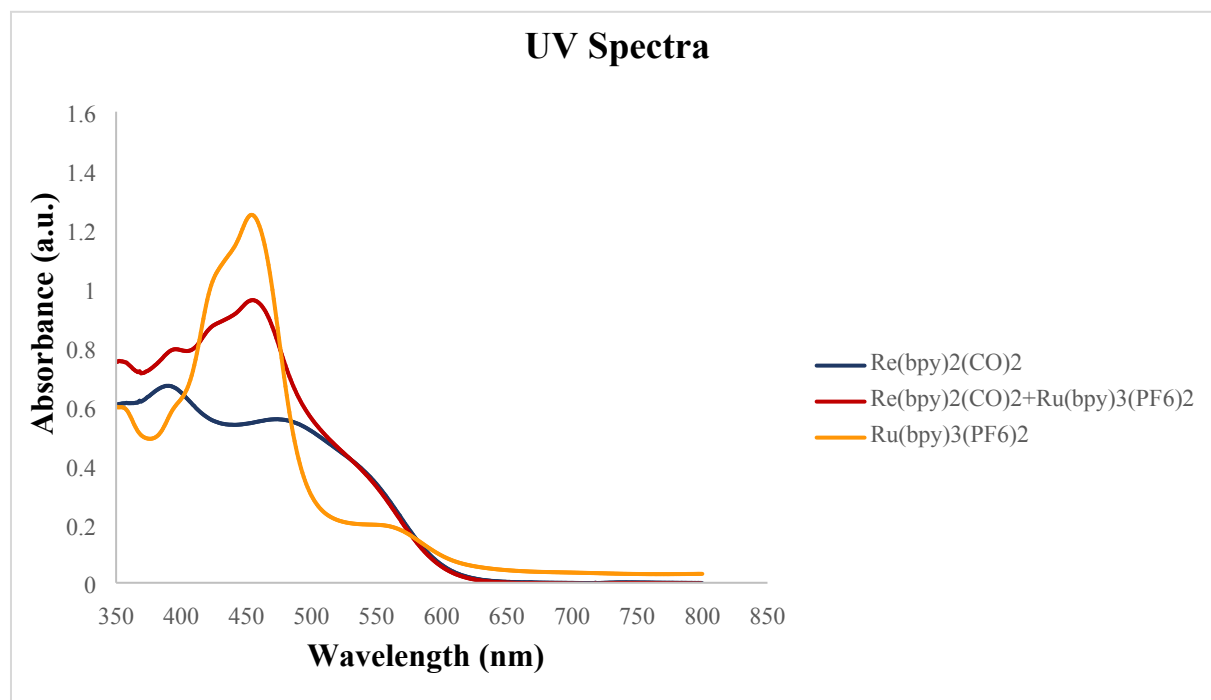

**Figure S10.** Uv-vis of complexes [Re(CO)<sub>2</sub>(κ<sup>2</sup>-bpy)<sub>2</sub>]<sup>+</sup>OTf<sup>-</sup> (black), [Ru(bpy)<sub>3</sub>](PF<sub>6</sub>)<sub>2</sub> (yellow) and a combination of these two complexes (red). Spectra obtained in CH<sub>2</sub>Cl<sub>2</sub> solvent.



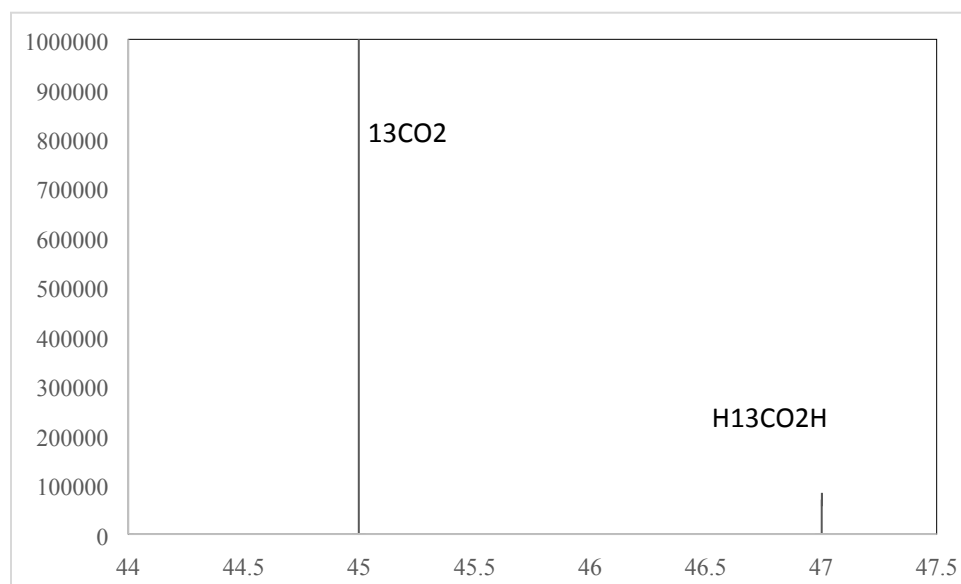

**Figure S11.** High resolution MS of the headspace of a photocatalytic reduction experiment in DMF using  $^{13}\text{CO}_2$  with complex  $[\text{Re}(\text{CO})_2(\kappa^2\text{-bpy})_2]^+\text{OTf}^-$  as catalyst. Mass peaks for  $\text{H}^{13}\text{CO}_2\text{H}$ ,  $^{13}\text{CO}_2$  are indicated.

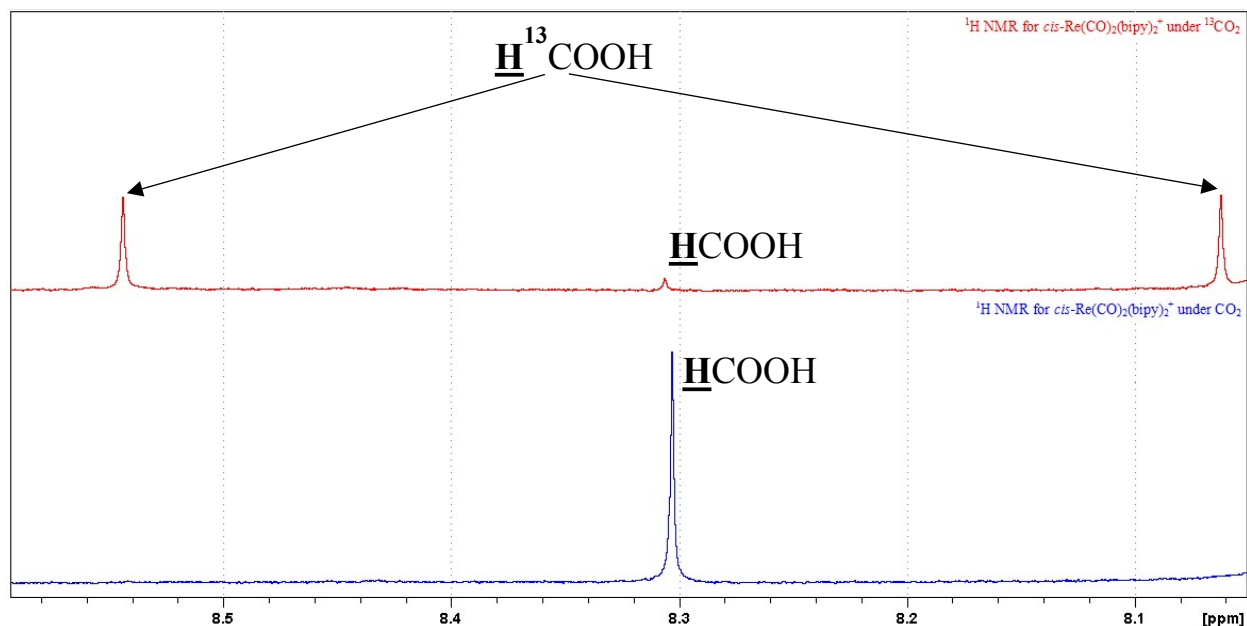

**Figure S12.**  $^1\text{H}$  NMR spectra for the formyl  $\text{HOOC}-\underline{\text{H}}$  proton of formic acid obtained from photocatalytic reduction of  $\text{CO}_2$  using  $\text{cis}-[\text{Re}(\text{CO})_2(\kappa^2\text{-bpy})_2]^+\text{OTf}^-$  as the catalyst. The bottom spectrum was from reaction using unlabeled  $\text{CO}_2$  and the top spectrum is from a reaction with labeled  $^{13}\text{CO}_2$ .

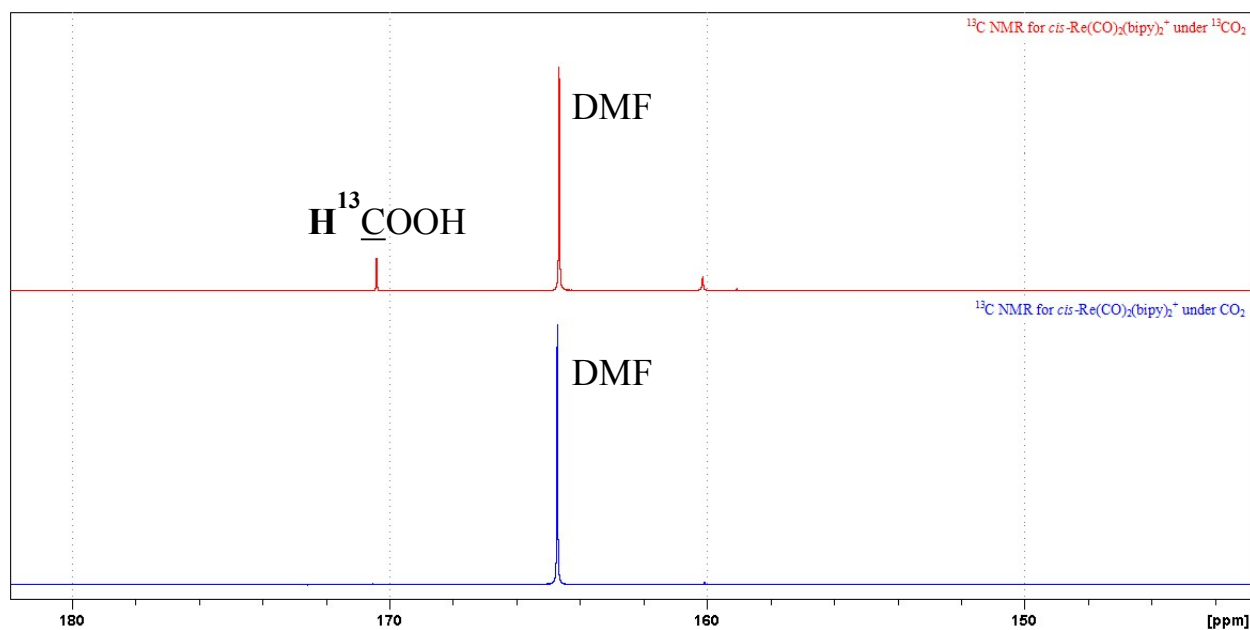

**Figure S13.**  $^{13}\text{C}$  NMR spectra in  $\text{D}_2\text{O}$  for the photocatalytic reduction of  $^{13}\text{CO}_2$  (top) to produce formic acid using  $\text{cis}-\text{Re}(\text{CO})_2(\text{bipy})_2^+\text{OTf}^-$  as the catalyst. For comparison, a reaction using unlabeled  $\text{CO}_2$  (bottom) is shown.

**Table S2.** Summary of results for the photocatalytic CO<sub>2</sub> reduction with [Re(CO)<sub>2</sub>(κ<sup>2</sup>-bpy)<sub>2</sub>]<sup>+</sup>OTf<sup>-</sup> (**1<sup>+</sup>OTf<sup>-</sup>**) in dimethylformamide (DMF), dimethylacetamide (DMA) and acetonitrile (CH<sub>3</sub>CN). Irradiation with 405 nm light conducted on solution under a CO<sub>2</sub> atmosphere for 24 h. Electron donor used was triethanolamine (TEOA).

| Catalyst (μmol) | Ru(bpy) <sub>3</sub> <sup>2+</sup> (μmol) | Solvent            | H <sub>2</sub> (μmol) | TON (H <sub>2</sub> ) | HCOOH (μmol)     | TON (HCOOH)       | Selectivity |
|-----------------|-------------------------------------------|--------------------|-----------------------|-----------------------|------------------|-------------------|-------------|
| -               | 4                                         | DMA                | 7                     | 1.75 <sup>a</sup>     | 50               | 12.5 <sup>a</sup> | 87%         |
| -               | 4                                         | DMF                | 8                     | 2 <sup>a</sup>        | 60               | 15 <sup>a</sup>   | 88%         |
| -               | 4                                         | CH <sub>3</sub> CN | 6                     | 1.5 <sup>a</sup>      | 10               | 2.5 <sup>a</sup>  | 63%         |
| 4               | -                                         | DMA                | -                     | -                     | 41               | 10.3              | 100%        |
| 4               | 4                                         | DMA                | 6                     | 1.5                   | 208 <sup>a</sup> | 52                | 97%         |
| 4               | -                                         | DMF                | 3                     | 0.8                   | 43               | 10.8              | 93%         |
| 4               | 4                                         | DMF                | 11                    | 2.8                   | 262 <sup>a</sup> | 66                | 96%         |
| 4               | -                                         | CH <sub>3</sub> CN | -                     | -                     | -                | -                 | -           |
| 4               | 4                                         | CH <sub>3</sub> CN | 11                    | 2.8                   | 46 <sup>a</sup>  | 11.5              | 80%         |

<sup>a</sup> TON based on Ru(bpy)<sub>3</sub><sup>2+</sup>

<sup>b</sup> corrected for background due to Ru(bpy)<sub>3</sub><sup>2+</sup>

**Table S3.** The time profile for the CO<sub>2</sub> photocatalytic reduction using [Re(CO)<sub>2</sub>(κ<sup>2</sup>-bpy)<sub>2</sub>]<sup>+</sup>OTf<sup>-</sup> (**1<sup>+</sup>OTf<sup>-</sup>**) with Ru(bpy)<sub>3</sub><sup>2+</sup> as **PS** in dimethylformamide (DMF). Irradiation with 405 nm light conducted on solution under a CO<sub>2</sub> atmosphere. Electron donor used was triethanolamine (TEOA).

| Time (h) | H <sub>2</sub> | TON <sub>H<sub>2</sub></sub> | HCOOH | TON <sub>HCOOH</sub> | Selectivity for HCOOH |
|----------|----------------|------------------------------|-------|----------------------|-----------------------|
| 0        | 0              | 0                            | 0     | 0                    | -                     |
| 8        | 4              | 1                            | 50    | 12.5                 | 0.93                  |
| 12       | 10             | 2.5                          | 78    | 19.5                 | 0.89                  |
| 24       | 11             | 4.5                          | 202   | 50.5                 | 0.95                  |
| 48       | 24             | 6                            | 238   | 59.5                 | 0.91                  |
| 72       | 34             | 8.5                          | 277   | 69.25                | 0.89                  |

**Table S4.** Summary of results for the photocatalytic CO<sub>2</sub> reduction with [Re(CO)<sub>2</sub>(κ<sup>2</sup>-bpy)<sub>2</sub>]<sup>+</sup>OTf<sup>-</sup> (**1<sup>+</sup>OTf<sup>-</sup>**) in dimethylformamide (DMF) or dimethylacetamide (DMA) using added proton sources of either H<sub>2</sub>O or phenol. Irradiation with 405 nm light conducted on solution under a CO<sub>2</sub> atmosphere for 24 h. Electron donor (approx. 1mL) used was triethanolamine (TEOA) or trimethylamine (TEA).

| Catalyst (μmol) | Ru(bpy) <sub>3</sub> <sup>2+</sup> (μmol) | Solvent | ED   | Additive                 | H <sub>2</sub> (μmol) | HCOOH (μmol) |
|-----------------|-------------------------------------------|---------|------|--------------------------|-----------------------|--------------|
| 4               | 4                                         | DMF     | TEOA | H <sub>2</sub> O (0.5mL) | 17                    | 100          |
| 4               | 4                                         | DMF     | TEOA | H <sub>2</sub> O (1mL)   | 23                    | 103          |
| 4               | 4                                         | DMF     | TEOA | Phenol (0.5g)            | 21                    | 108          |
|                 | 4                                         | DMF     | TEOA | Phenol (1g)              | 23                    | 76           |
| 4               | 4                                         | DMF     | TEA  | H <sub>2</sub> O (0.5mL) | 8                     | 50           |
| 4               | 4                                         | DMF     | TEA  | H <sub>2</sub> O (1mL)   | 11                    | 58           |
| 4               | 4                                         | DMF     | TEA  | Phenol (0.5g)            | 4                     | 41           |
| 4               | 4                                         | DMF     | TEA  | Phenol (1g)              | 65                    | 45           |
| 4               | 4                                         | DMA     | TEOA | H <sub>2</sub> O (0.5mL) | 13                    | 82           |
|                 | 4                                         | DMA     | TEOA | H <sub>2</sub> O (1mL)   | 14                    | 96           |
| 4               | 4                                         | DMA     | TEOA | Phenol (0.5g)            | 31                    | 120          |
| 4               | 4                                         | DMA     | TEOA | Phenol (1g)              | 36                    | 139          |

**Table S5.** Effects of different concentration of catalyst *cis*-[Re(CO)<sub>2</sub>(bipy)<sub>2</sub>]<sup>+</sup>OTf<sup>-</sup> (**1<sup>+</sup>OTf<sup>-</sup>**) for the photocatalytic reduction of CO<sub>2</sub>. Reaction conditions: DMA: TEOA (4:1) 4 mL; photosensitizer [Ru(bpy)<sub>3</sub>]<sup>2+</sup> (1mM) under CO<sub>2</sub> atmosphere.

| Catalyst (mM)  | H <sub>2</sub> (μmol) | TON (H <sub>2</sub> ) | HCOOH (μmol) | TON (HCOOH) | selectivity | HCOOH rate /hr | TOF hr-1 |
|----------------|-----------------------|-----------------------|--------------|-------------|-------------|----------------|----------|
| 1 <sup>a</sup> | -                     | -                     | 41           | 10.3        | 1           | 1.7            | 0.43     |
| 1              | 6                     | 1.5                   | 208          | 52          | 0.97        | 8.7            | 2.2      |
| 0.5            | 29                    | 15                    | 229          | 115         | 0.89        | 9.5            | 4.8      |
| 0.2            | 19                    | 24                    | 220          | 275         | 0.92        | 9.2            | 11.5     |
| 0.1            | 15                    | 38                    | 171          | 428         | 0.92        | 7.1            | 17.8     |
| 0.05           | 10                    | 50                    | 107          | 535         | 0.91        | 4.5            | 22.3     |
| 0.02           | 18                    | 225                   | 118          | 1480        | 0.87        | 4.9            | 61.5     |
| 0.01           | 15                    | 375                   | 110          | 2750        | 0.88        | 4.6            | 114.6    |

<sup>a</sup> No added Ru(bpy)<sub>3</sub><sup>2+</sup>

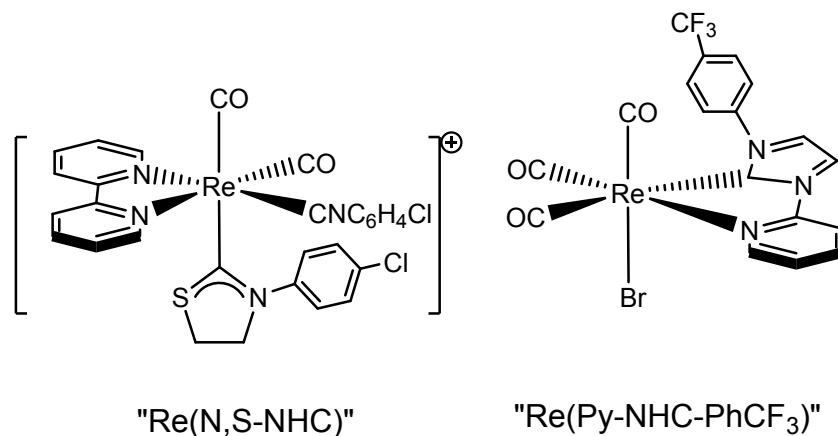

**Figure S14.** Representations of  $\text{Re}(N,S\text{-NHC})$  and  $\text{Re}(\text{Py-NHC-PhCF}_3)$  presented in Table 1 of the manuscript.

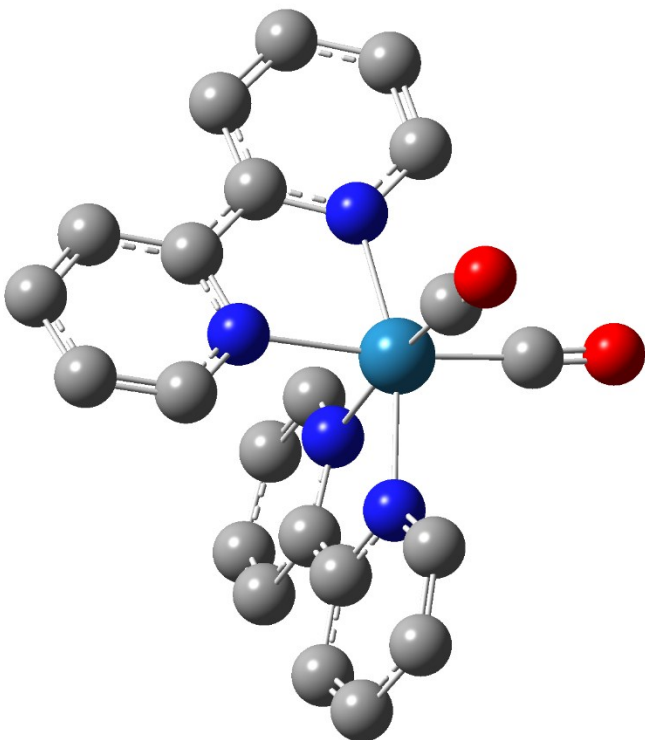

**Figure S15.** A ball and stick structural representation for the computationally optimized  $[\text{Re}(\text{CO})_2(\kappa^2\text{-bpy})_2]$  compound **A**. DFT calculations used the B3LYP functional and the def2TZVP basis set. Hydrogen atoms are not shown for clarity. Some carbon atoms have been removed for clarity.

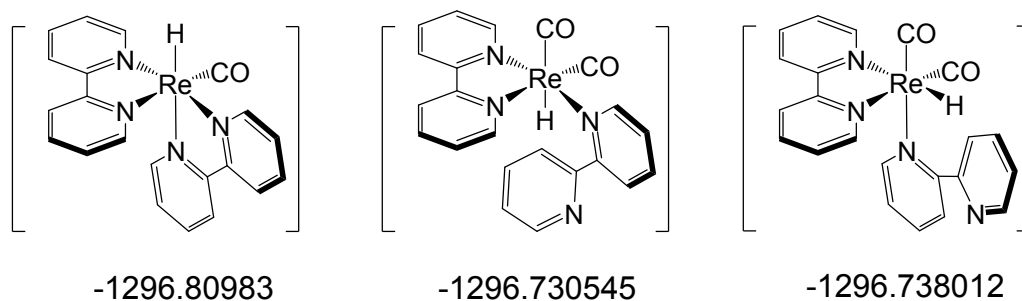

**Figure S16.** Representations of the three possible protonation products to yield Re-H intermediates that may arise in the catalytic cycle shown in Figure 3 of the manuscript. Each of these species was computationally optimized as a means of determining the most likely structure of proposed **ReH**. DFT calculations used the B3LYP functional and the def2TZVP basis set (see Figures S14, S15). The results for the energies associated with each of these possibilities is indicated in Hartrees. This indicated that  $[\text{Re}(\text{CO})(\kappa^2\text{-bpy})_2\text{H}]$  was the lowest energy species and was thus used in the proposed cycle.

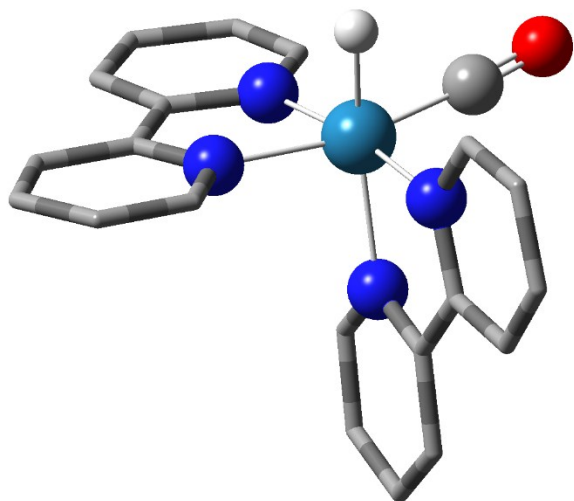

**Figure S17.** A ball and stick structural representation for the computationally optimized  $[\text{Re}(\text{CO})(\kappa^2\text{-bpy})_2\text{H}]$  compound **ReH**. DFT calculations used the B3LYP functional and the def2TZVP basis set. Hydrogen atoms are not shown for clarity. Some carbon atoms have been removed for clarity.



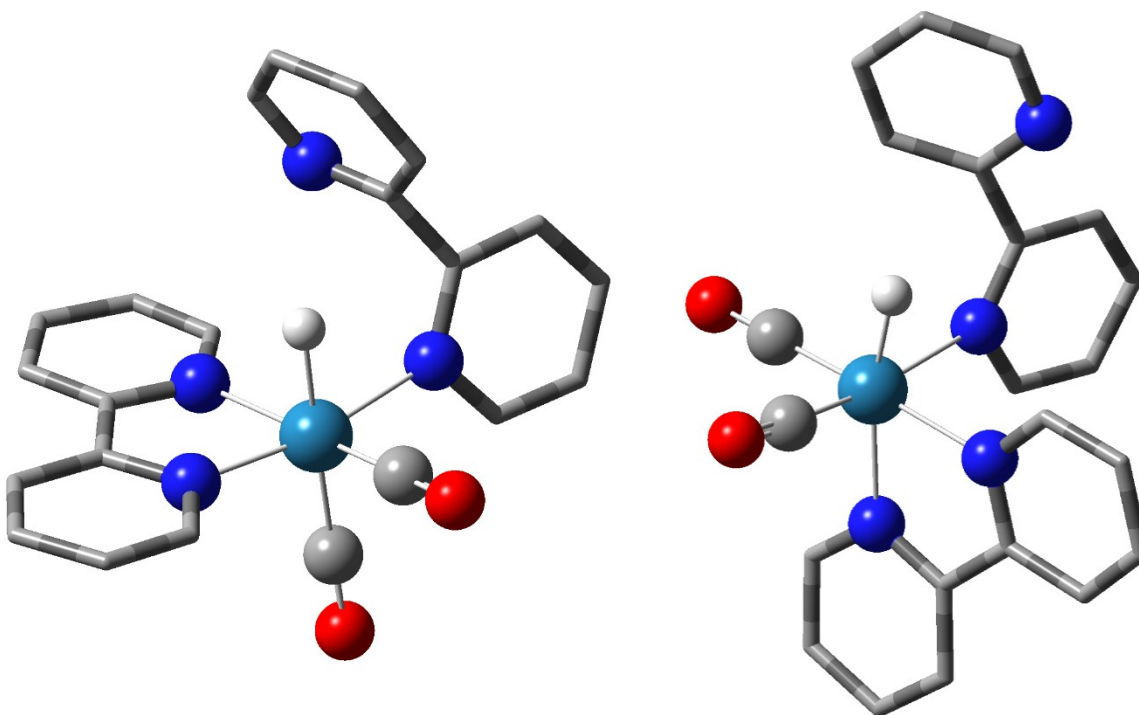

**Figure S18.** Ball and stick structural representations for the two isomers of the computationally optimized  $[\text{Re}(\text{CO})_2(\kappa^1\text{-bpy})(\kappa^2\text{-bpy})\text{H}]$  compound as a proposed intermediate in the catalytic cycle (see Figure S13 and Figure 3). DFT calculations used the B3LYP functional and the def2TZVP basis set. Hydrogen atoms are not shown for clarity. Some carbon atoms have been removed for clarity.

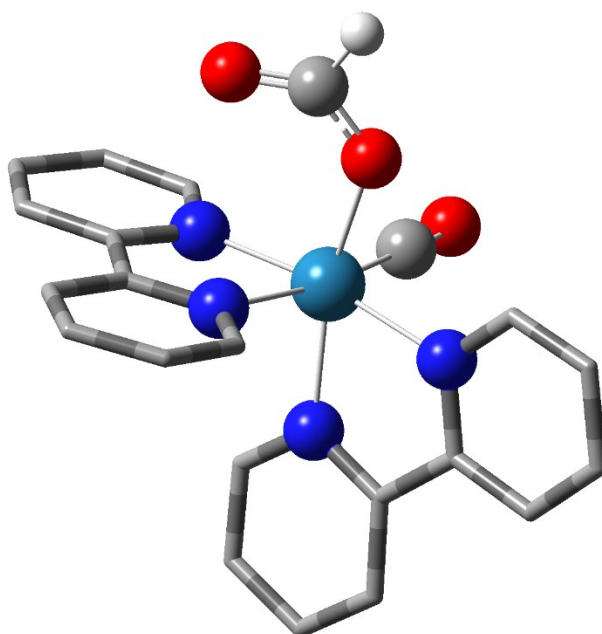

**Figure S19.** A ball and stick structural representation for the computationally optimized  $[\text{Re}(\kappa^2\text{-bpy})_2(\text{CO})(\text{OC}(\text{O})\text{H})]$  compound **Re(form)**. DFT calculations used the B3LYP functional and the def2TZVP basis set. Hydrogen atoms are not shown for clarity. Some carbon atoms have been removed for clarity.

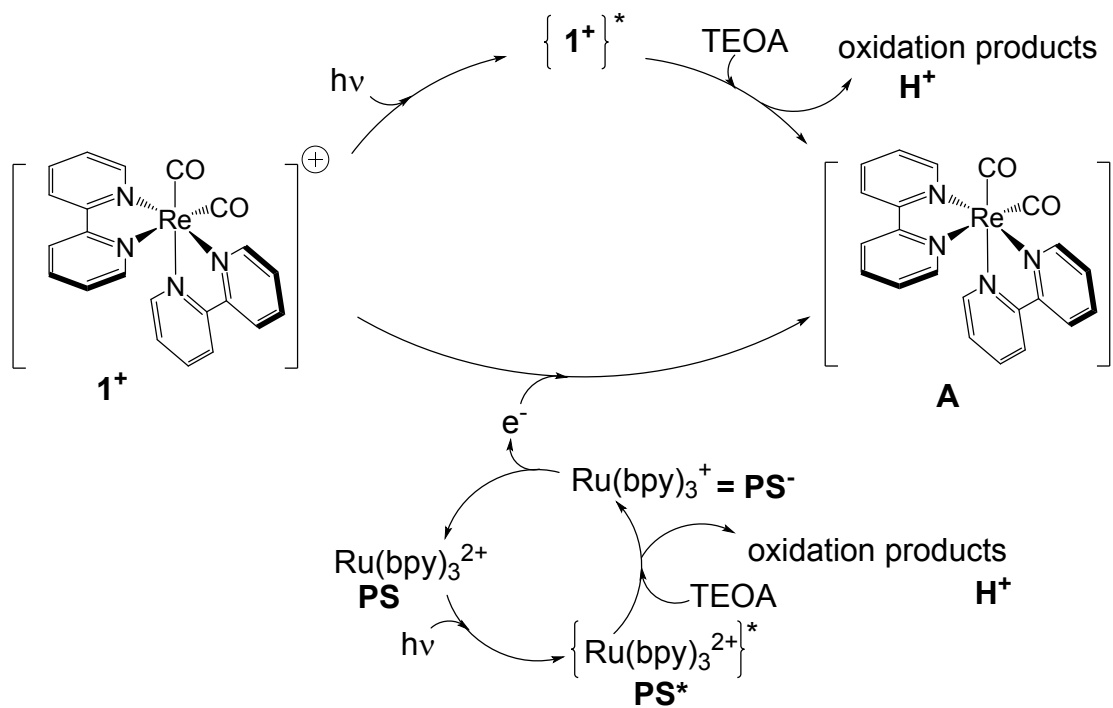

**Figure S20.** Additional details for the proposed reduction of  $1^+$  to **A** providing entry into the catalytic cycle represented in Figure 3 of the manuscript text. The upper electron transfer process operates with  $1^+$  as an integrated photosensitizer and catalyst. The electrons for the catalytic cycle come from reductive quenching by TEOA of the photoexcited  $\{1^+\}^*$ . The lower process represents the electron cycle that originates from the  $Ru(bpy)_3^{2+}$  photosensitizer.

## References:

- [1] S. P. Pitre, C. D. McTiernan, W. Vine, R. Dipucchio, M. Grenier, J. C. Scaiano, *Sci. Rep.* **2015**, *5*, 1–10.
- [2] Y. Hameed, B. Gabidullin, D. Richeson, *Inorg. Chem.* **2018**, *57*, 13092–13096.
- [3] APEX Software Suite v 2010 Bruker AXS Inc. Madison Wisconsin USA, **2010**.
- [4] R. H. Blessing, *Acta Crystallogr. Sect. A* **1995**, *33*–38.
- [5] G. M. Sheldrick, *Acta Crystallogr. Sect. A* **2008**, *112*–122.
- [6] M. J. Frisch, G. W. Trucks, H. B. Schlegel, G. E. Scuseria, M. A. Robb, J. R. Cheeseman, G. Scalmani, V. Barone, G. A. Petersson, H. Nakatsuji, et al., **2016**.
- [7] J. L. Smithback, J. B. Helms, E. Schutte, S. M. Woessner, B. P. Sullivan, *Inorg. Chem.* **2006**, *45*, 2163–74.
- [8] T. N. Twala, A. Roodt, H. G. Visser, *Dalton Trans.* **2015**, *44*, 3278–3288.
